# Supplementary material for: Synthesis and characterization of a new phenothiazine-based sensitizer/co-sensitizer for efficient dye-sensitized solar cell performance using a gel polymer electrolyte and Ni–TiO2as a photoanode
Source: Royal Society of Chemistry journal article supplement (doi:10.1039/d2nj03589h), 2022-01-01
Supplement: d2nj03589h1.pdf [file d2nj03589h1.pdf]

## Synthesis and characterization of new phenothiazine-based sensitizer/co-sensitizer for an efficient dye-sensitized solar cell performance using gel polymer electrolyte and Ni-TiO<sub>2</sub> as a photoanode

Dheeraj Devadiga<sup>a</sup>, M. Selvakumar<sup>a\*</sup>, Deepak Devadiga<sup>b</sup>, T. N. Ahipa<sup>b</sup>, Prakasha Shetty<sup>a</sup>,  
Selvaraj Paramasivam<sup>c</sup>, S. Senthil Kumar<sup>c</sup>

<sup>a</sup>Department of Chemistry, Manipal Institute of Technology, Manipal Academy of Higher Education, Manipal, 576104, Karnataka, India.

<sup>b</sup>Centre for Nano and Material Sciences, Jain University, Jain Global Campus, Jakkasandra Post, Ramanagara District, Bangalore, 562112, India.

<sup>c</sup>Electrodics and Electrocatalysis Division, CSIR-Central Electrochemical Research Institute, Karaikudi, 630003, India.

\*Corresponding author: M. Selvakumar: [chemselva78@gmail.com](mailto:chemselva78@gmail.com)

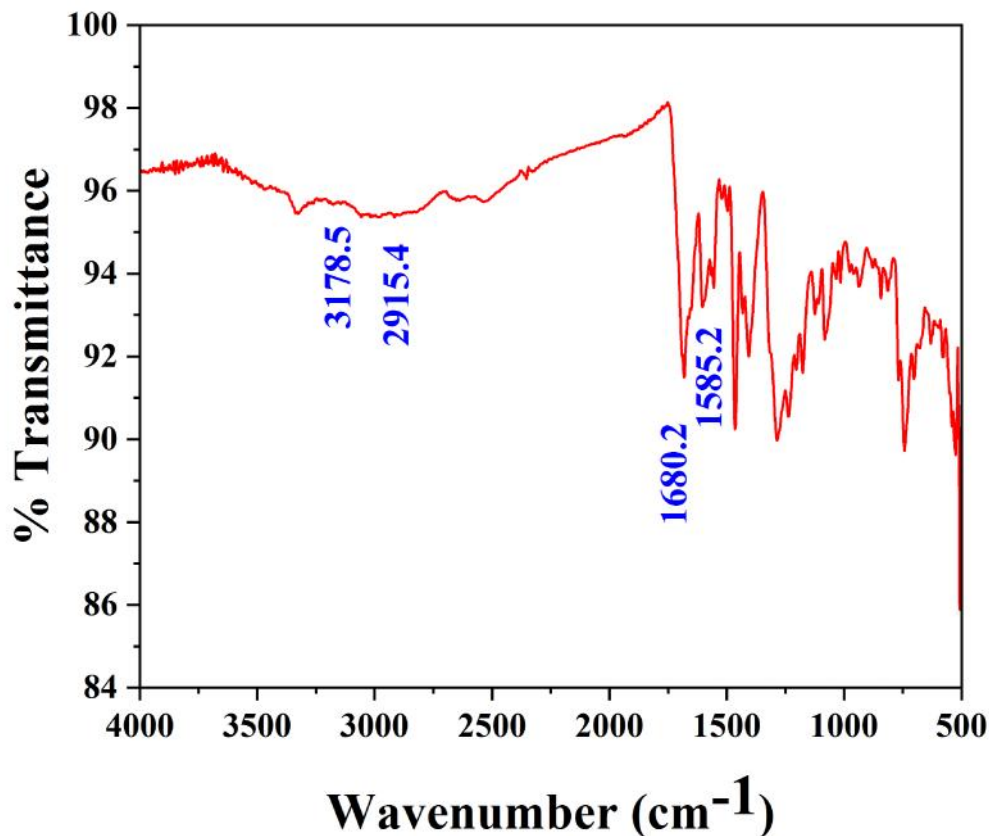

Fig. S1: IR spectra of POBA dye.



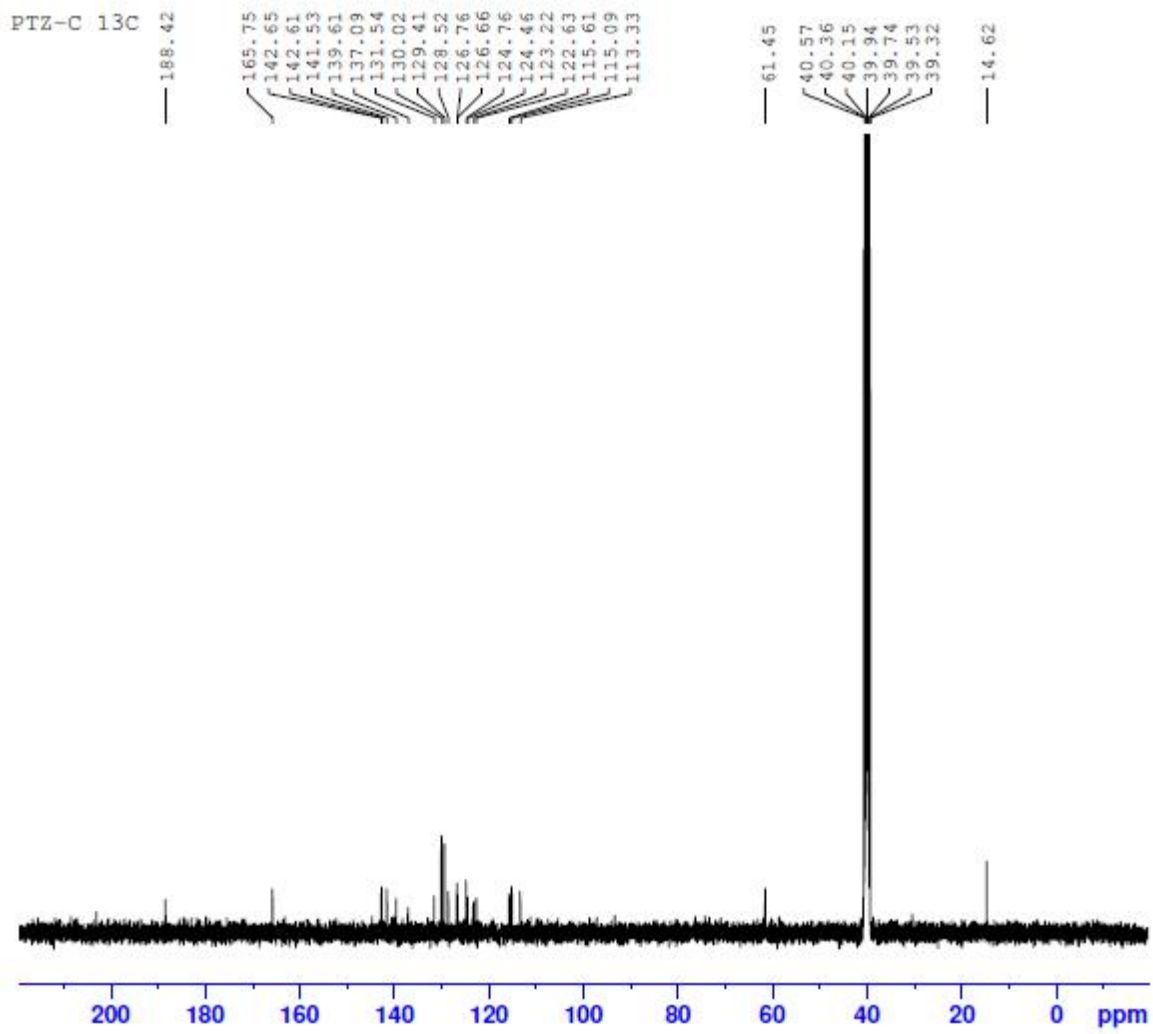

Fig. S3:  $^{13}\text{C}$  spectra of POBA dye.

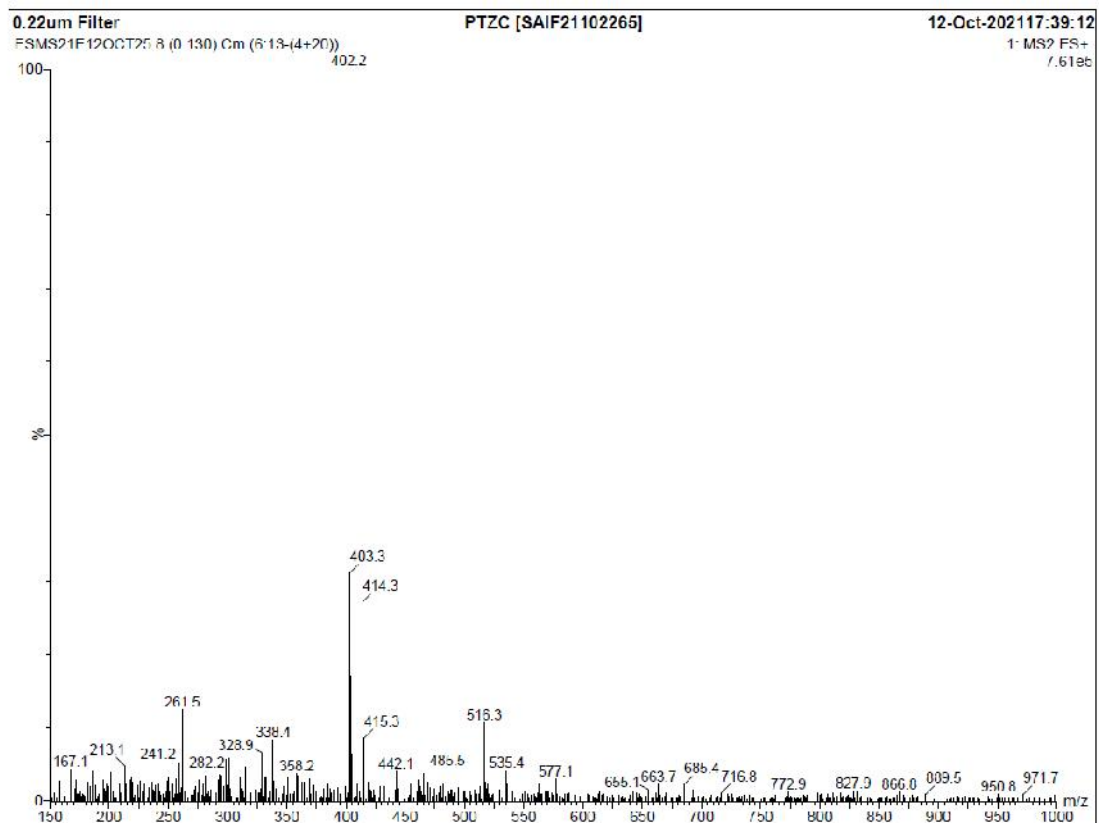

**Fig. S4:** Mass spectra of POBA dye.

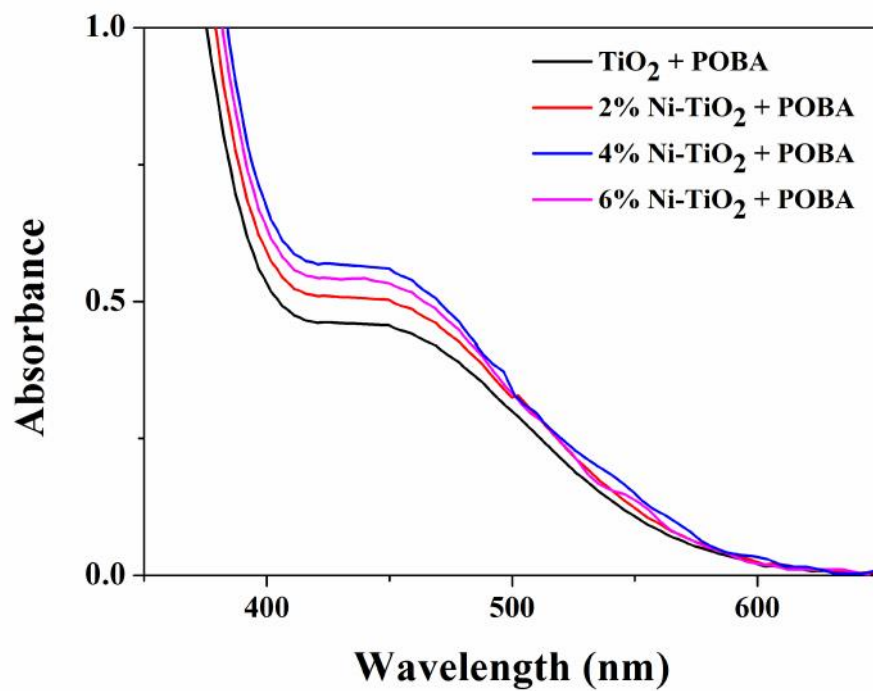

**Fig. S5:** Absorbance spectra of POBA dye anchored different pristine and doped TiO<sub>2</sub> films.

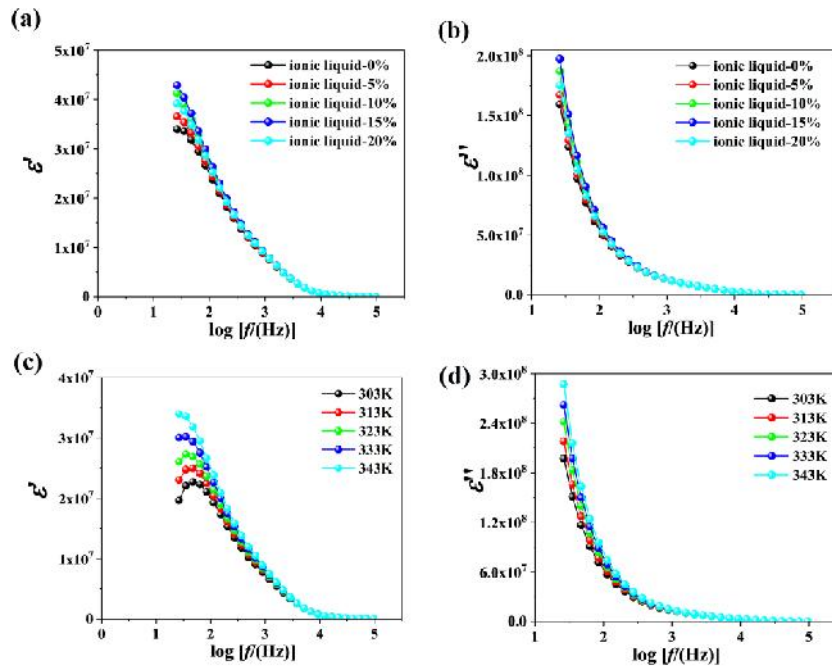

**Fig. S6:** (a) Variation of  $Z'$  with  $\log f$  for each sample, (b) Variation of  $Z''$  of each sample with  $\log f$ , (c) Variation of  $Z'$  of ionic liquid-15% at different temperatures with  $\log f$  and (d) Variation of  $Z''$  of ionic liquid-15% at different temperatures with  $\log f$ .

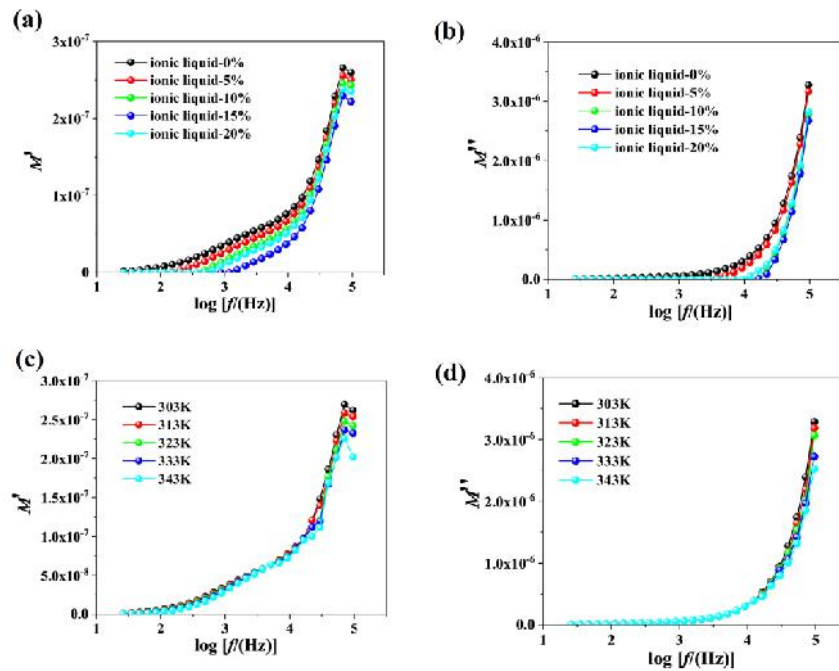

**Fig. S7:** (a) Variation of  $M'$  of each sample with  $\log f$ , (b) Variation of the imaginary part electrical modulus of each sample with  $\log f$ , (c) The  $M'$  of ionic liquid-15% at different temperatures with  $\log f$ , and (d) Variation of  $M''$  of ionic liquid-15% at different temperatures with  $\log f$ .

**Table S1:** Photovoltaic characteristics of DSSCs with different bare TiO<sub>2</sub> film thicknesses sensitized with POBA dye (0.5 mM).

| Thickness (μm) | V <sub>OC</sub> (V) | J <sub>SC</sub> (mA cm <sup>-2</sup> ) | FF % | PCE % |
|----------------|---------------------|----------------------------------------|------|-------|
| ~5.5           | 0.61                | 3.04                                   | 53   | 0.98  |
| ~10.7          | 0.59                | 3.11                                   | 56   | 1.02  |
| ~15.3          | 0.59                | 3.57                                   | 57   | 1.21  |
| ~20.8          | 0.60                | 3.45                                   | 55   | 1.13  |

**Table S2:** Photovoltaic characteristics of DSSCs with different concentration of POBA dye.

| Concentration (mM) | V <sub>OC</sub> (V) | J <sub>SC</sub> (mA cm <sup>-2</sup> ) | FF % | PCE % |
|--------------------|---------------------|----------------------------------------|------|-------|
| 0.3                | 0.56                | 3.41                                   | 54   | 1.03  |
| 0.5                | 0.59                | 3.57                                   | 57   | 1.21  |
| 0.7                | 0.57                | 3.51                                   | 55   | 1.10  |

**Table S3:** Photovoltaic characteristics of DSSCs with different concentration of co-sensitizer.

| Concentration of Z907 (mM) | Concentration of POBA (mM) | V <sub>OC</sub> (V) | J <sub>SC</sub> (mA cm <sup>-2</sup> ) | FF % | PCE % |
|----------------------------|----------------------------|---------------------|----------------------------------------|------|-------|
| 0.5                        | 0.3                        | 0.71                | 10.03                                  | 70   | 4.98  |
| 0.5                        | 0.5                        | 0.73                | 11.15                                  | 71   | 5.77  |
| 0.5                        | 0.7                        | 0.72                | 9.90                                   | 71   | 5.06  |

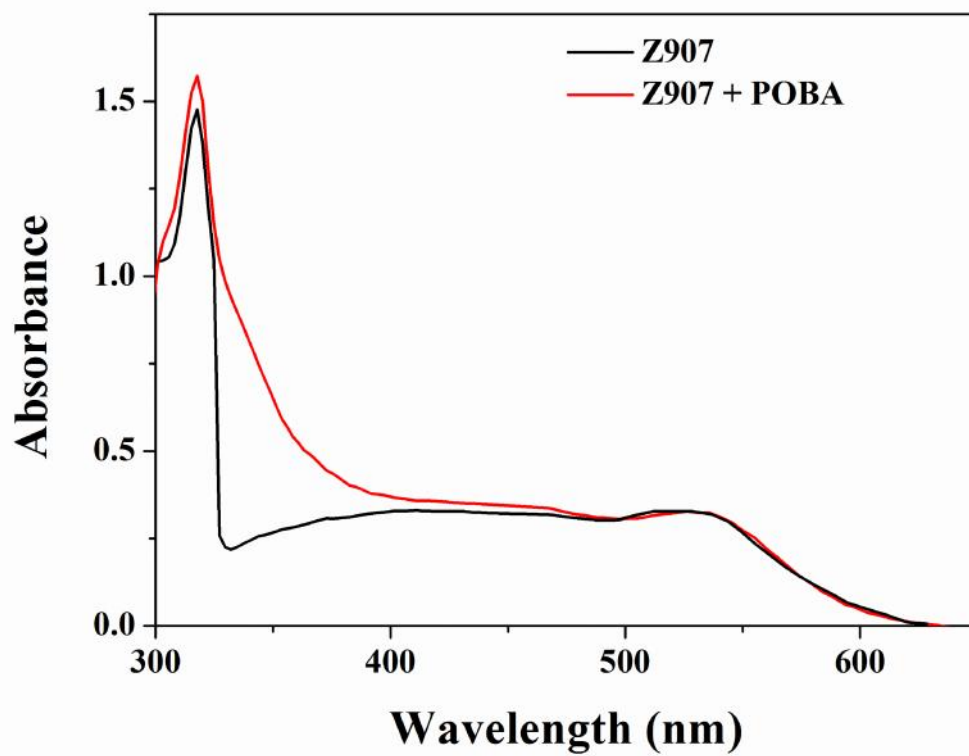

**Fig. S8:** Absorption spectra of Z907 and Z907 + POBA anchored onto 4% Ni-TiO<sub>2</sub>.
